# Supplementary material
Source: publisher figshare collection journal article supplement (https://acs.figshare.com/ndownloader/files/3807040)
Supplement: Supplementary file 1 [file 3807040]

# Supporting Information

## Hybridized Electromagnetic-Triboelectric Nanogenerator for Scavenging Air-Flow Energy to Sustainably Power Temperature Sensors

*Xue Wang,<sup>†</sup> Shuhua Wang,<sup>†</sup> Ya Yang,<sup>†,\*</sup> and Zhong Lin Wang<sup>†,||,\*</sup>*

<sup>†</sup>Beijing Institute of Nanoenergy and Nanosystems, Chinese Academy of Sciences, China

<sup>||</sup>School of Materials Science and Engineering, Georgia Institute of Technology, Atlanta, Georgia 30332-0245, United States

\*To whom correspondence should be addressed: Emails: [yayang@binn.cas.cn](mailto:yayang@binn.cas.cn);  
[zlwang@gatech.edu](mailto:zlwang@gatech.edu)

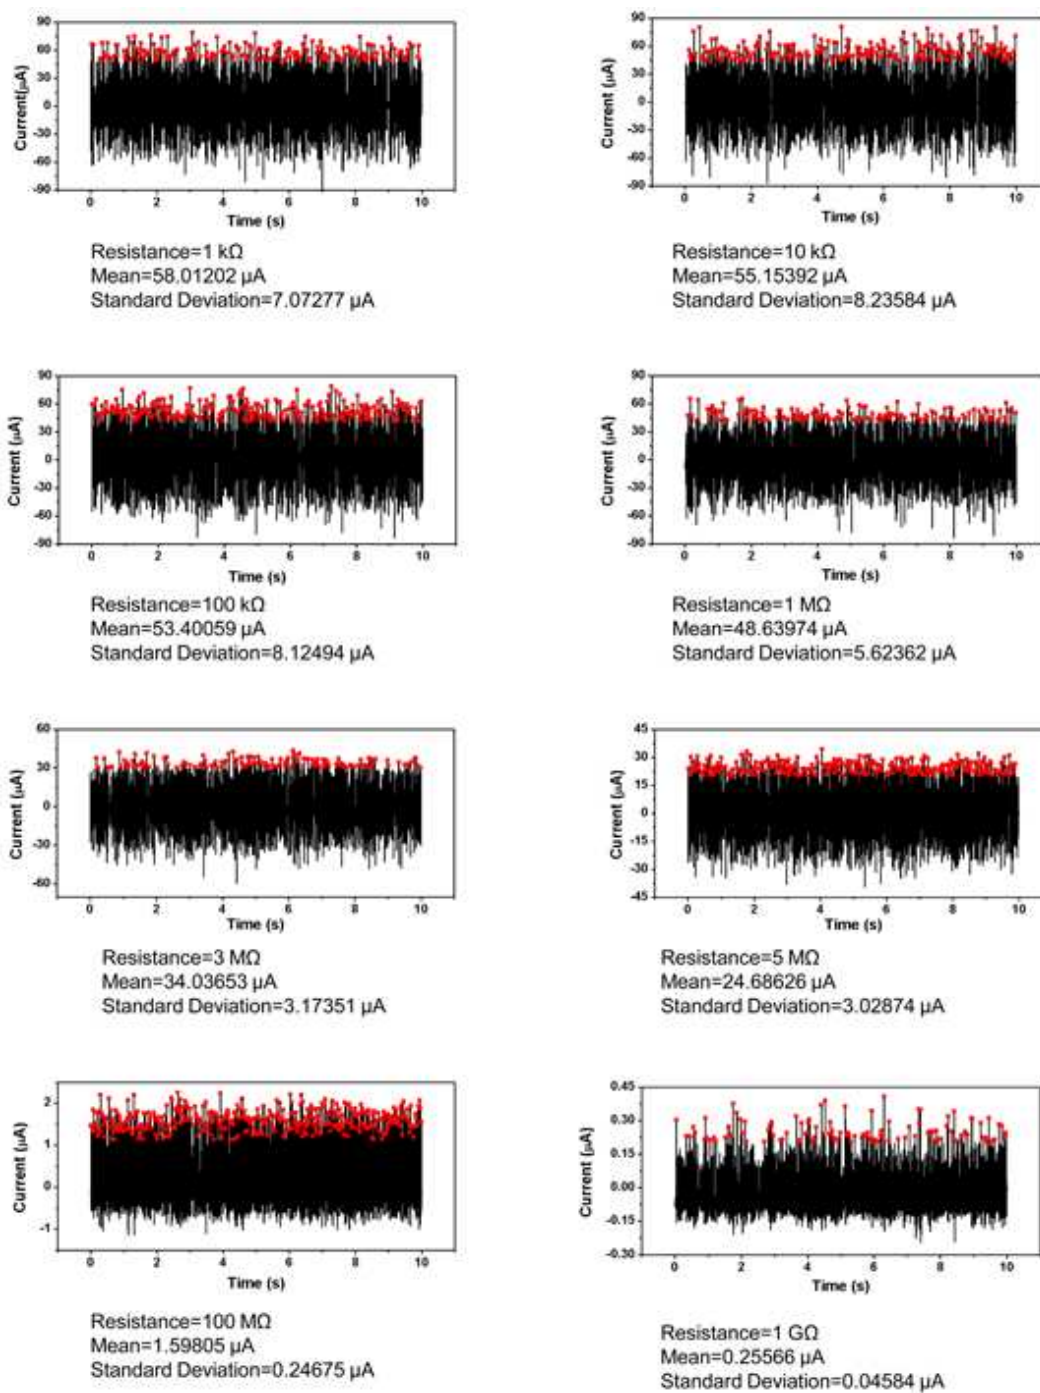

**Figure S1** Original data of TENG 1 under the different loading resistances.

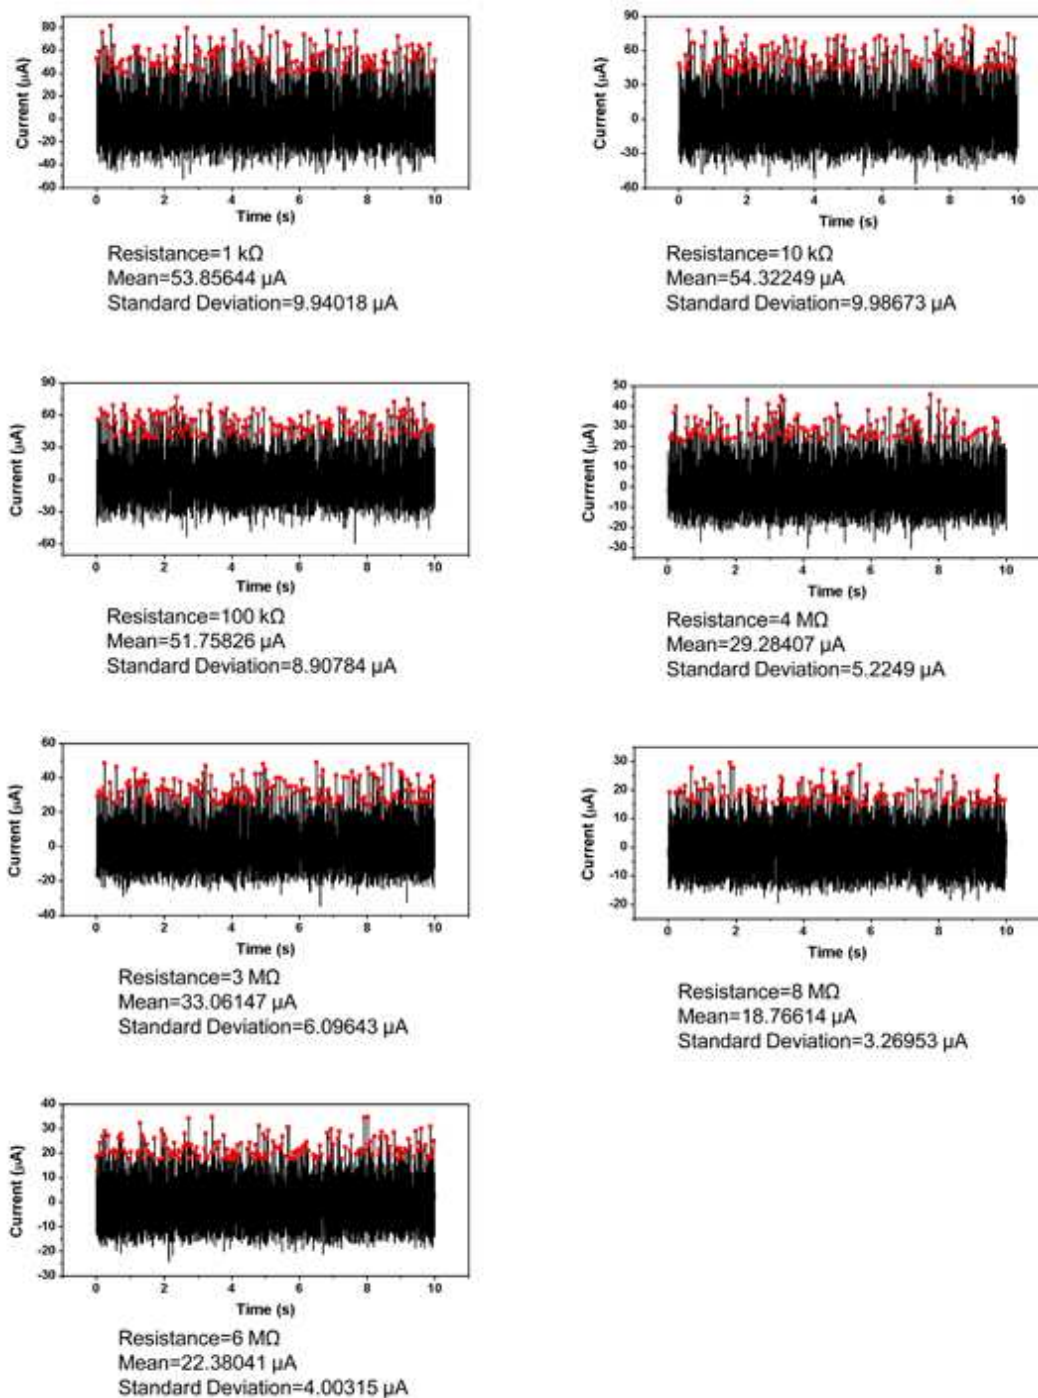

**Figure S2** Original data of TENG 2 under the different loading resistances.

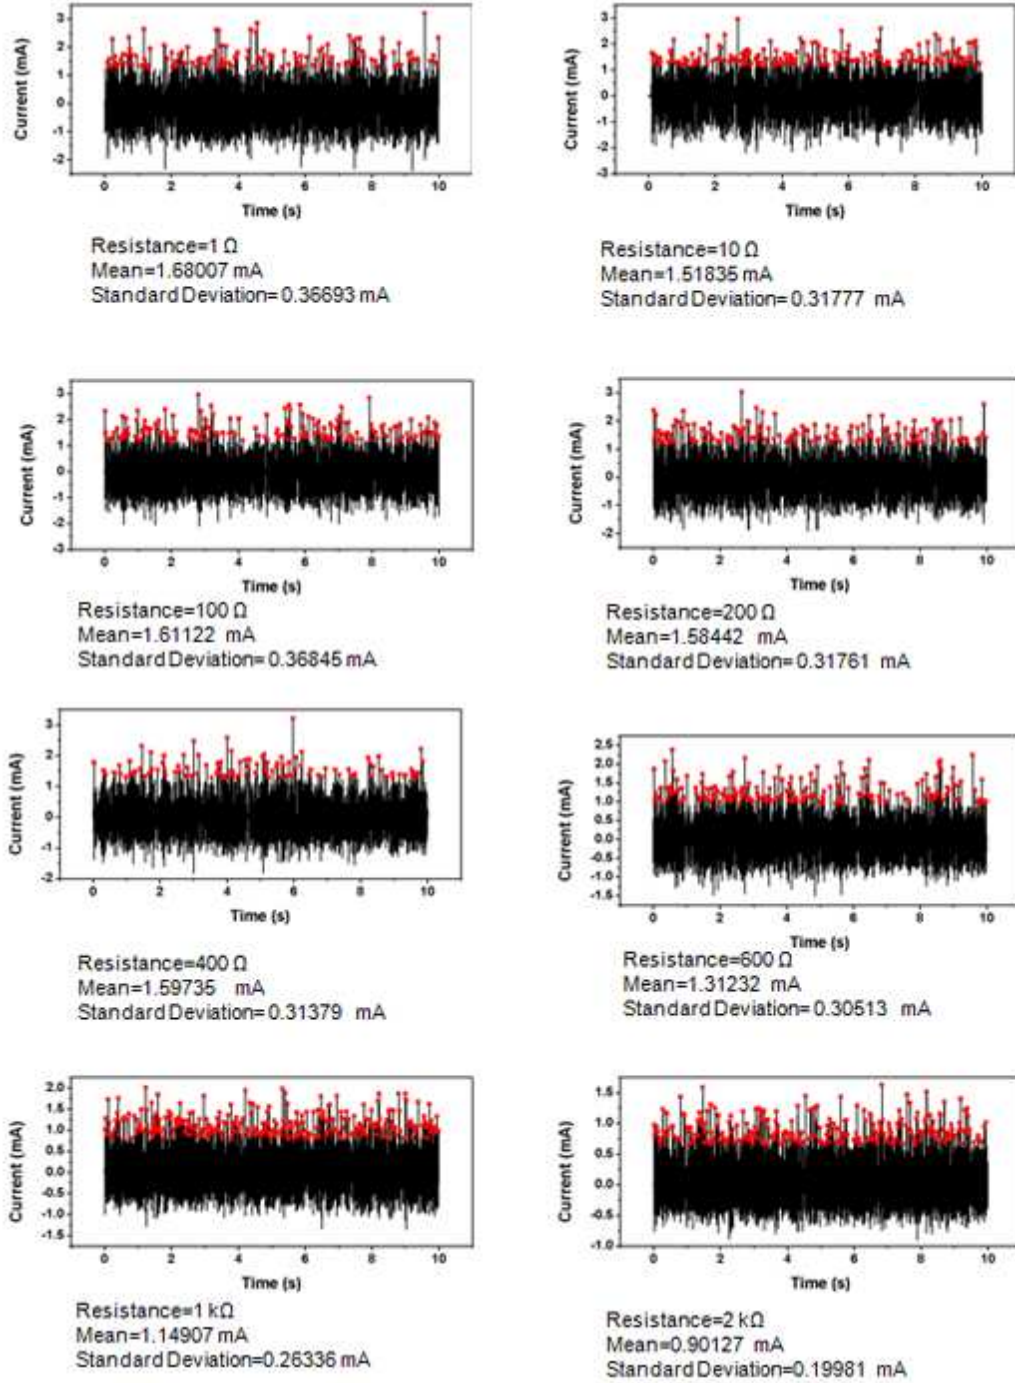

**Figure S3** Original data of TENG 1 after using a transformer under the different loading resistances.

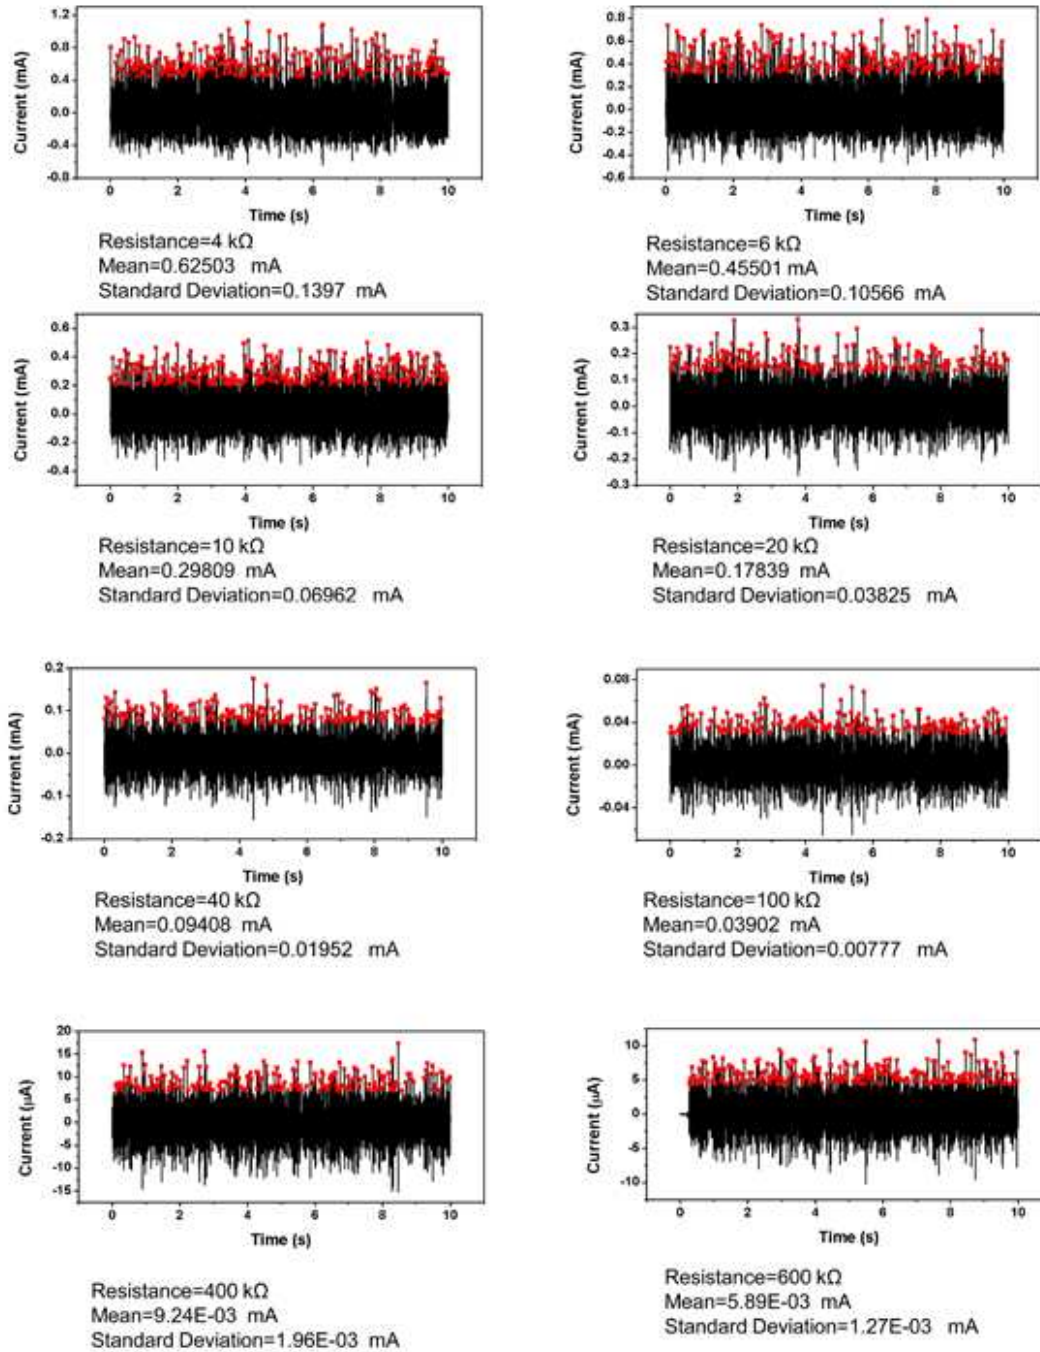

**Figure S4** Original data of TENG 1 after using a transformer under the different loading resistances.



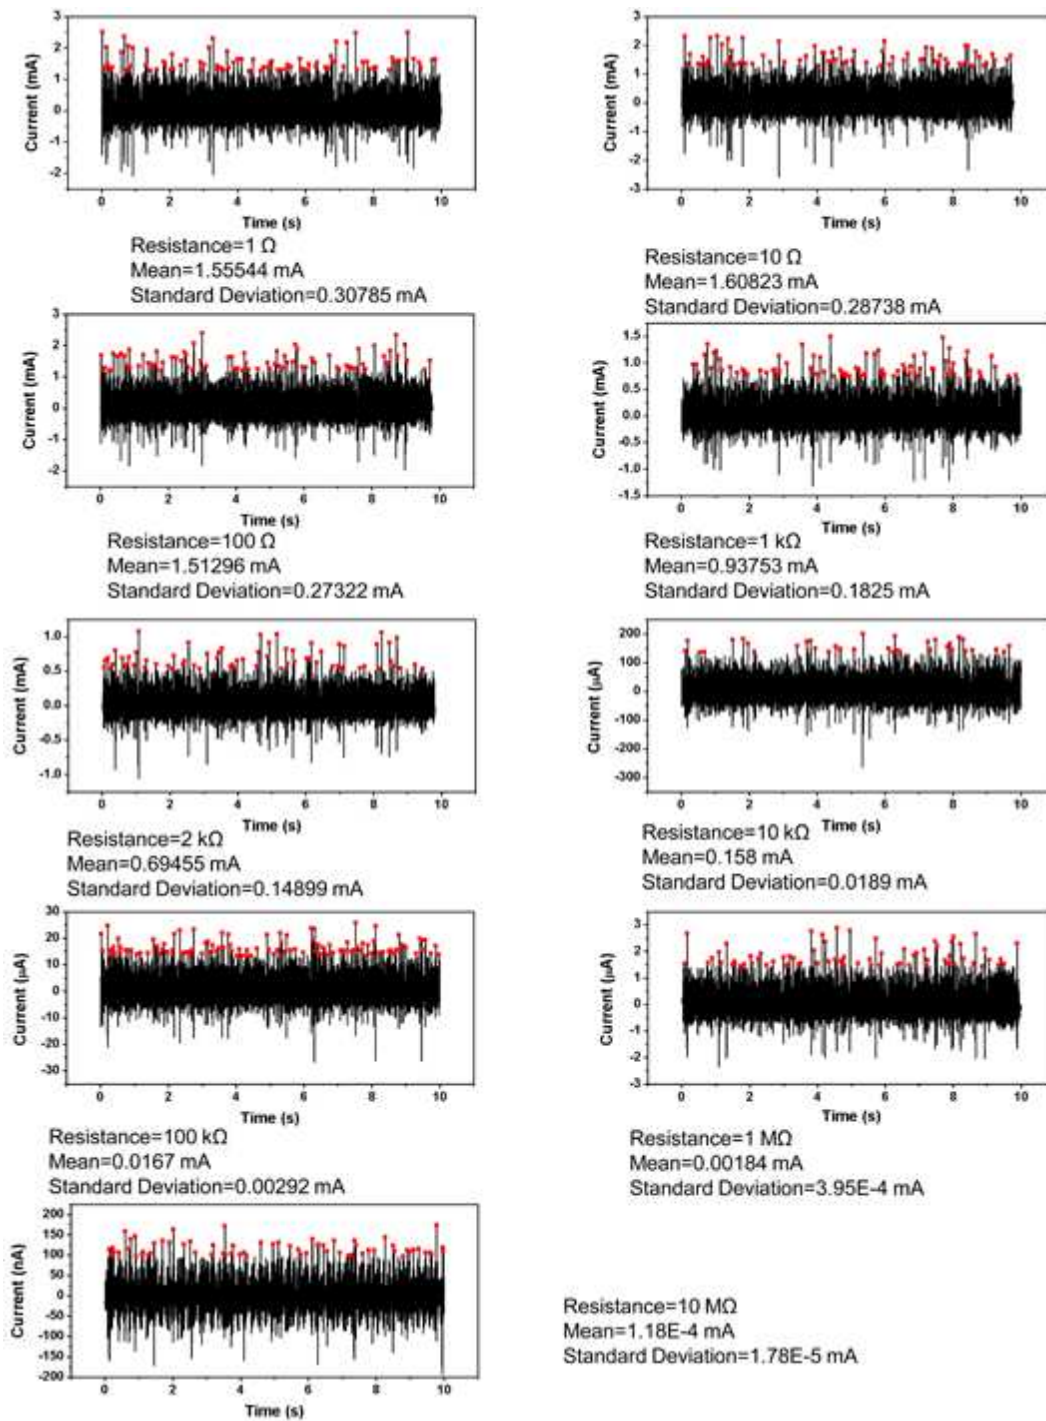

**Figure S5** Original data of EMG 1 under the different loading resistances.

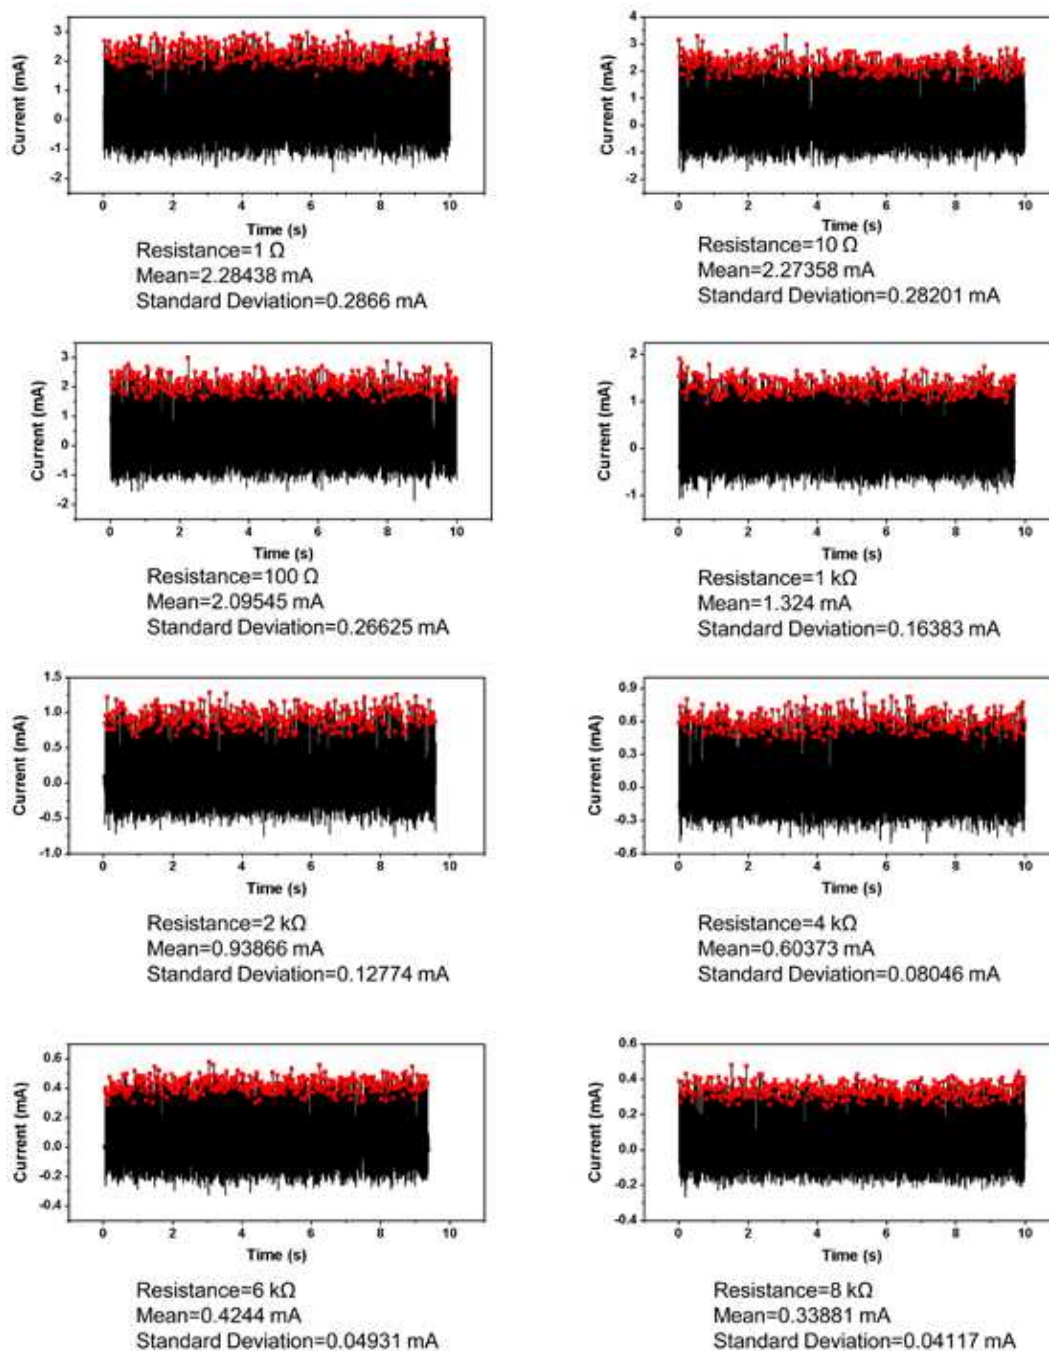

**Figure S6** Original data of EMG 2 under the different loading resistances.

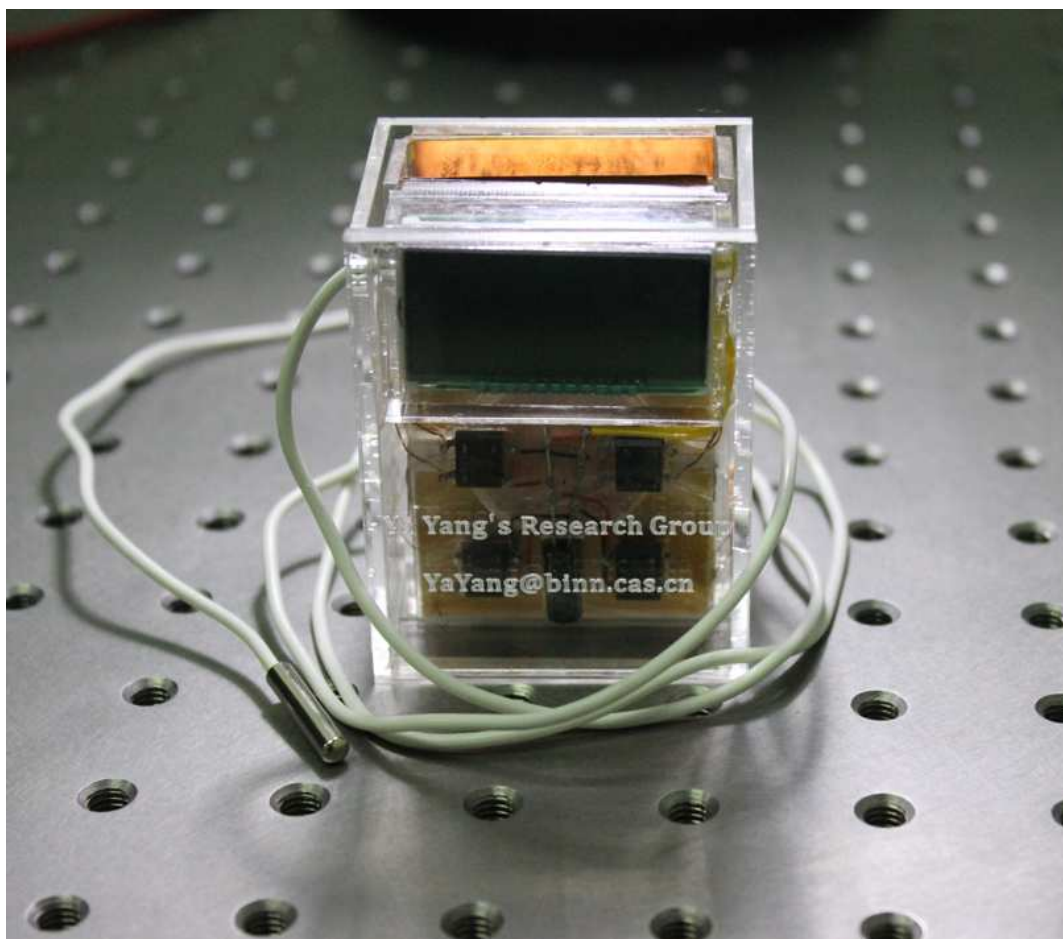

**Figure S7** Photograph of a fabricated self-powered temperature sensor system.



# Movie files

**Movie file-1.** Air-flow driven vibration behavior of the kapton film.

**Movie file-2.** The hybridized nanogenerator driven LEDs.

**Movie file-3.** The hybridized nanogenerator driven LEDs for providing the illumination for reading printed text.

**Movie file-4.** The hybridized nanogenerator driven capacitor for sustainably powering temperature sensors.

**Movie file-5.** The human mouth blowing induced air-flow to drive the hybridized nanogenerator for powering a temperature sensor.

**Movie file-6.** Self-powered temperature sensor system that is based on the human mouth blowing induced air-flow to drive the hybridized nanogenerator.
